# Supplementary material
Source: PubMed Central journal article supplement (PMC7205428)
Supplement: jciinsight-5-135350-s076.pdf [file jciinsight-5-135350-s076.pdf]

## **The PAMPer study group Investigators and Collaborators**

### **University of Pittsburgh, Presbyterian Hospital; Clinical Coordinating center and enrolling site:**

Jason L. Sperry, MD, MPH, Francis X. Guyette, MD, MPH, Mazen S. Zenati, MD, PhD, Joshua B. Brown, MD, MSc, Mark H. Yazer, MD, Darrell J. Triulzi, MD Barbara J. EarlyYoung, BSN, Peter W. Adams, BS, Louis H. Alarcon, MD, Clifton W. Callaway, MD, PhD, Brian S. Zuckerbraun, MD, Matthew D. Neal, MD, Raquel M. Forsythe, MD, Timothy R. Billiar, MD, Donald M. Yealy, MD, Andrew B. Peitzman, MD, Meghan L. Buck, Ashley M. Ryman, Elizabeth A. Gimbel, Erin G. Gilchrist, Meghan Buhay, Chung-Chou H. Chang, Victor B. Talisa, Tianyuan Xu, Multidisciplinary Acute Care Research Organization (MACRO)-MACRO Research Specialists, MACRO Clinical Trials Research Associates. **University of Tennessee Health Science Center:** Brian J. Daily, MD, Kyle Kalloway, Andrew Yates, Susan Rawn. **Vanderbilt University Medical Center:** Richard S. Miller, MD, Judith M. Jenkins. **University of Louisville:** Brain G. Harbrecht, MD, Laura S. Trachtenberg, Randi K. Eden. **MetroHealth Medical Center/Case Western Reserve University:** Jeffrey A. Claridge, MD, Joanne Fraifogl, Craig Bates, MD. **University of Texas Southwestern/Parkland Memorial Hospital:** Herb A. Phelan, MD, Christina Howard, Cari Stebbins. **Texas Health Harris Methodist Hospital:** William R. Witham, MD, Cathy McNeill. **University of Pittsburgh Medical Center, Altoona Hospital:** A. Tyler. Putnam, MD, Amy Snyder, Jason Ropp. **John Peter Smith Health Network:** Therese M. Duane, MD, Celeste Caliman, Mieshia Beamon.

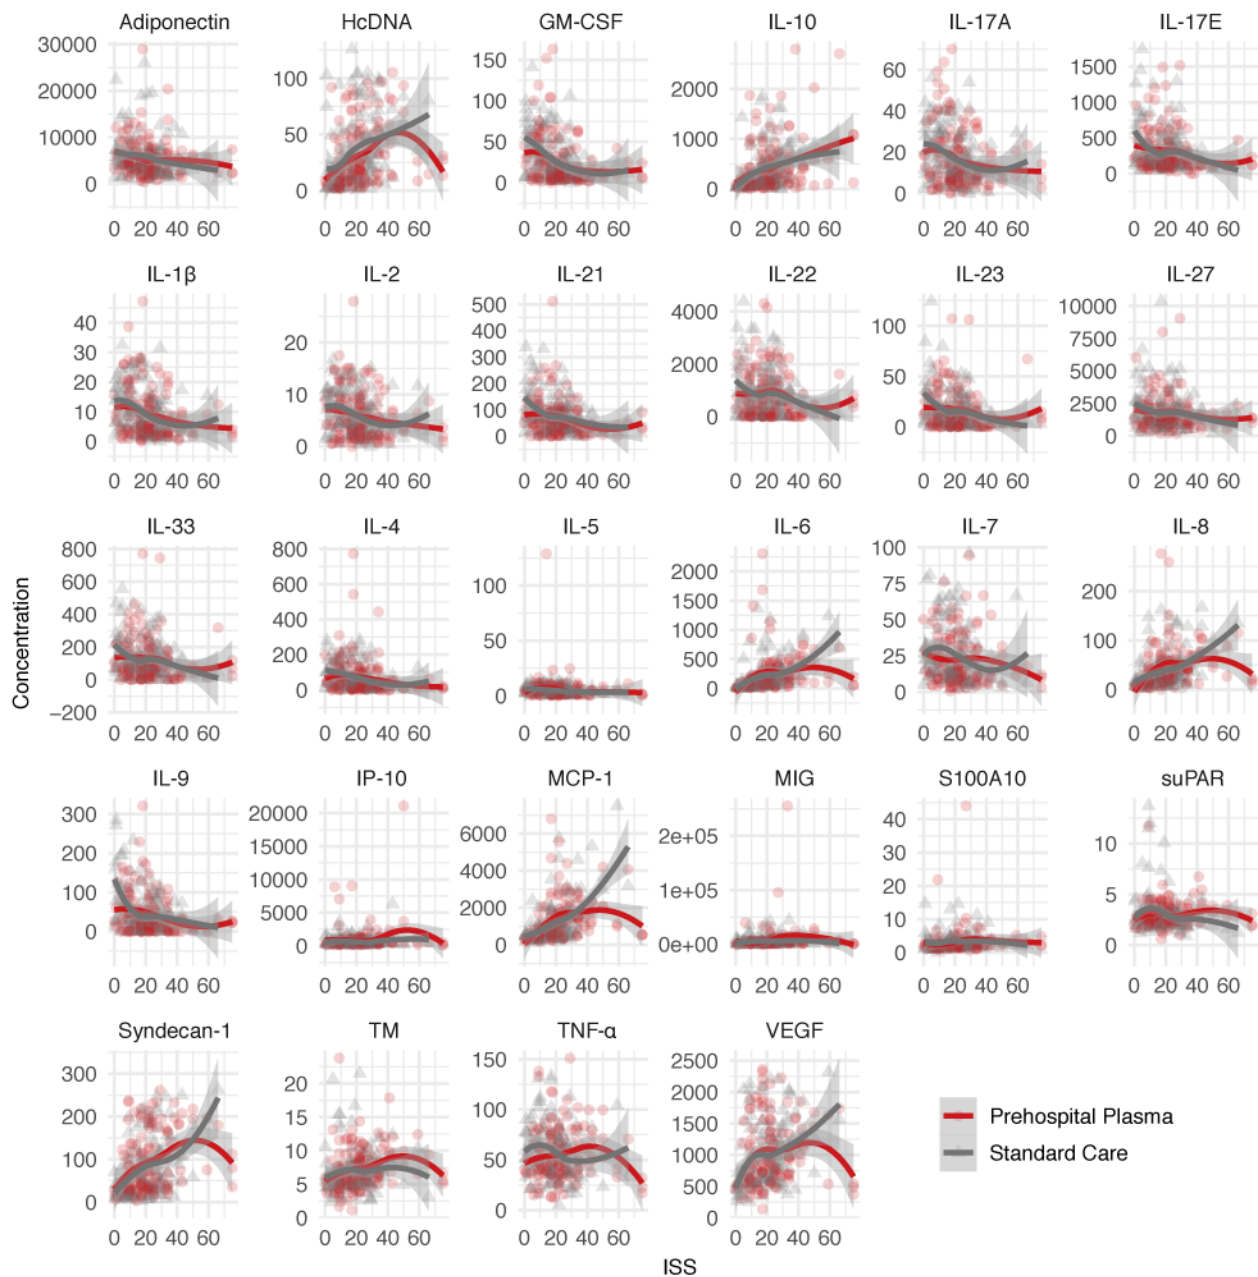

**Supplemental Figure 1.** Early (0 hours) inflammatory and endothelial marker concentrations plotted against injury severity score (ISS) in patients who survived to 30 days. Grey triangles represent patients in the standard care arm and red circles represent patients in the prehospital plasma arm. Shading represents the 95% confidence interval. Inflammatory mediators (n=263) are reported in pg/mL except IL-23 which is reported in ng/mL. We report adiponectin, S100A10, suPAR, syndecan-1, and TM, in ng/mL, VEGF in pg/mL, and DNA (histone-complexed) in relative units (n=262).
